# Supplementary material for: Roadmap zum sichereren Risikomanagement des Umweltschadstoffes „Radon“
Source: Springer Nature journal article supplement (doi:10.1007/s40664-022-00456-y), 2022-02-28
Supplement: MOESM1 [file 40664_2022_456_MOESM1_ESM.docx]

Tabelle 2 Radonvorsorgegebiete nach Gemeinden

| Bundesland | Stand |
| --- | --- |
| Schleswig-Holstein | Kein Radonvorsorgegebiete ausgewiesen |
| Niedersachsen | Nach der Allgemeinverfügung vom 30.11.20 Radonvorsorgegebiete:  **Braunlage**  Braunlage mit den Ortsteilen Brunnenbachsmühle und Königskrug  Hohegeiß  Sankt Andreasberg mit den Ortsteilen Oderberg, Oderbrück, Oderhaus, Odertaler Sägemühle, Silberhütte, Sonnenberg  **Clausthal-Zellerfeld**  Clausthal mit Polsterberger Hubhaus  Zellerfeld mit Erbprinzentanne  Buntenbock  Altenau mit den Ortsteilen Torfhaus, Bastesiedlung, Sperberhaier Dammhaus, Gemkenthal, Polstertaler Zechenhaus;  Schulenberg im Oberharz mit den Ortsteilen Oberschulenberg, Mittelschulenberg, Festenburg, Forsthaus Ahrendsberg;  Wildemann (Spiegelthaler Zechenhaus)  **Goslar-Stadt**  Kernstadt mit den Ortsteilen Altstadt, Baßgeige, Georgenberg mit Kattenberg, Jürgenohl mit Kramerswinkel, Ohlhof mit Gut Ohlhof, Rammelsberg mit Siemensviertel und Rosenberg,  Steinberg  Sudmerberg  Oker  Vienenburg  Jerstedt  Immenrode  Hahndorf  Wiedelah  Hahnenklee-Bockswiese  Lengde  Lochtum  Weddingen |
| Mecklenburg-Vorpommern | Kein Radonvorsorgegebiete ausgewiesen |
| Hamburg | Kein Radonvorsorgegebiete ausgewiesen |
| Bremen | Kein Radonvorsorgegebiete ausgewiesen |
| Brandenburg | Kein Radonvorsorgegebiete ausgewiesen |
| Berlin | Kein Radonvorsorgegebiete ausgewiesen |
| Nordrhein-Westfalen | Kein Radonvorsorgegebiete ausgewiesen |
| Sachsen-Anhalt | Nach der Allgemeinverfügungen ab 30.12.2020  **Landkreis Harz**  Falkenstein/Harz, Stadt  Harzgerode, Stadt  Ilsenburg/Harz, Stadt  Oberharz am Brocken, Stadt  Thale, Stadt  Wernigerode, Stadt  **Landkreis Mansfeld-Südharz**  Allstedt, Stadt  Arnstein, Stadt  Goldene Aue  Hettstedt, Stadt  Lutherstadt Eisleben, Stadt  Mansfeld, Stadt  Mansfelder Grund-Helbra  Sangerhausen, Stadt  Südharz |
| Hessen | Kein Radonvorsorgegebiete ausgewiesen |
| Sachsen | Allgemeinverfügungen ab 30.12.2020  **Erzgebirgskreis**  Amtsberg  Annaberg-Buchholz, Stadt  Aue-Bad Schlema, Stadt  Auerbach  Bärenstein  Bockau  Börnichen/Erzgeb.  Breitenbrunn/Erzgeb.  Burkhardsdorf  Crottendorf  Deutschneudorf  Drebach  Ehrenfriedersdorf, Stadt  Eibenstock, Stadt  Elterlein, Stadt  Gelenau/Erzgeb.  Geyer, Stadt  Gronau/Erzgeb.  Großstolbersdorf  Großrückerswalde  Grünhain-Beierfeld, Stadt  Grünhainichen  Heidersdorf  Johanngeorgenstadt, Stadt  Jöhstadt, Stadt  Königswalde  Lauter-Bernsbach, Stadt  Marienberg, Stadt  Mildenau  Oberwiesenthal, Kurort, Stadt  Olbernhau, Stadt  Pockau-Lengefeld, Stadt  Raschau-Markersbach  Scheibenberg, Stadt  Schlettau, Stadt  Schneeberg, Stadt  Schönheide  Schwarzenberg/Erzgeb., Stadt  Sehmatal  Seiffen/Erzgeb., Kurort  Stollberg/Erzgeb., Stadt  Stützengrün  Tannenberg  Thalheim/Erzgeb., Stadt  Thermalbad Wiesenbad  Thum, Stadt  Wolkenstein, Stadt  Zschopau, Stadt  Zschorlau  **Mittelsachsen**  Augustusburg, Stadt  Bobritzsch-Hilbersdorf  Brand-Erbisdorf, Stadt  Dorfchemnitz  Eppendorf  Flöha, Stadt  Frauenstein, Stadt  Freiberg, Stadt, Universitätsstadt  Großhartmannsdorf  Halsbrücke  Leubsdorf  Lichtenberg/Erzgeb.  Mulda/Sa.  Neuhausen/Erzgeb.  Oberschöna  Oederan, Stadt  Rechenberg-Bienenmühle  Sayda, Stadt  Wießenborn/Erzgeb.  **Sächsische Schweiz-Osterzgebirge**  Altenberg, Stadt  Bad Gottleuba-Berggießhübel, Stadt  Dippoldiswalde, Stadt  Dorfhain  Freital, Stadt  Glashütte, Stadt  Hartmannsdorf-Reichenau  Hermsdorf/Erzgeb.  Klingenberg  Kreischa  Liebstadt, Stadt  Tharandt, Stadt  **Vogtlandkreis**  Adorf/Vogtl., Stadt  Auerbach/Vogtl., Stadt  Bad Brambach  Bad Elster, Stadt  Bergen  Eichigt  Ellefeld  Falkenstein/Vogtl., Stadt  Grünbach  Klingenthal, Stadt  Legenfeld, Stadt  Markneukirchen, Stadt  Mühlental  Muldenhammer  Neustadt/Vogtl.  Rodewisch, Stadt  Schöneck/Vogtl., Stadt  Steinberg  Theuma  Werda  **Zwickau**  Crinitzberg  Hartmannsdorf b. Kirchberg  Hirschfeld  Kirchberg, Stadt  Langenweißbach  Wilkau-Haßlau, Stadt |
| Thüringen | Allgemeinverfügungen ab 30.12.2020  **Wartburgkreis**  Ruhla, Stadt  **Schmalkalden-Meiningen**  Floh-Seligenthal  Oberhof, Stadt  **Gotha**  Luisenthal  Tambach-Dietharz/Thür. Wald, Stadt  **Hildburghausen**  Masserberg  Schleusegrund  **Ilm-Kreis**  Elgersburg  Großbreitenbach, Stadt  Ilmenau, Stadt  **Saalfeld-Rudolstadt**  Gräfenthal, Stadt  Katzhütte  Schwarzatal, Stadt  **Sonneberg**  Goldisthal  **Greiz** Kauern  Korbußen  Paitzdorf  Ronneburg, Stadt  **Altenburger Land** Posterstein |
| Saarland | Kein Radonvorsorgegebiete ausgewiesen |
| Rheinland-Pfalz | Kein Radonvorsorgegebiete ausgewiesen |
| Baden- Württemberg | Vom Ministerium für Umwelt Klima und Energiewirtschaft festgelegte Gebiete nach § 121 Strahlenschutzgesetz in Baden-Württemberg (Stand 15.06.2021)  **Breisgau-Hochschwarzwald**  Bollschweil  Horben  Münstertal  Oberried  Schluchsee    **Lörrach**  Aitern  Böllen  Fröhnd  Häg-Ehrsberg  Kleines Wiesental  Schönau im Schwarzwald  Schönenberg  Todtnau  Tunau  Utzenfeld  Wembach  Wieden  Zell im Wiesental  **Ortenau**  Gutach (Schwarzwaldbahn)  **Rottweil**  Lauterbach  Schiltach  **Schwarzwald-Baar**  Schonach  **Waldshut**  Dachsberg  Häusern  Herrischried  Ibach  Rickenbach  Sankt Blasien  Todtmoos |
| Bayern | Allgemeinverfügungen ab 11.02.2021  **Wunsiedel i. Fichtelgebirge**  Arzberg  Bad Alexandersbad  Höchstädt i. Fichtelgebirge  Hohenberg a.d. Eger  Kaiserhammer Forst- Ost  Kirchenlamitz  Marktleuthen  Marktredwitz  Martinlamitzer Forst- Süd  Meierhöfer Seite  Nagel  Neubauer Forst- Süd  Röslau  Schirmding  Schönwald  Selb  Thiersheim  Thierstein  Tröstau  Törstauer Forst- Ost  Törstauer Forst- West  Vordorfer Forst  Weißenstadt  Weißenstadter Forst- Nord  Weißenstadter Forst- Süd  Wunsiedel |
